# Supplementary material
Source: PubMed Central journal article supplement (PMC1629029)
Supplement: NIHMS11832-supplement-Sdata.pdf [file NIHMS11832-supplement-Sdata.pdf]

## SUPPLEMENTARY DATA

### Percentage of cell death in human and murine glioma cells infected with control vector HC-Ad- $\beta$ -Gal.

| Percentage of cell death |                 |                  |                     |                  |
|--------------------------|-----------------|------------------|---------------------|------------------|
| GBM cell                 | MOCK            |                  | HC-Ad- $\beta$ -Gal |                  |
|                          | GCV-            | GCV+             | GCV-                | GCV+             |
| U251                     | 6.98 $\pm$ 1.46 | 3.91 $\pm$ 0.76  | 3.06 $\pm$ 1.19     | 6.47 $\pm$ 0.92  |
| U87                      | 6.2 $\pm$ 0.79  | 7.2 $\pm$ 2.15   | 7.73 $\pm$ 0.94     | 12.93 $\pm$ 1.93 |
| IN2045                   | 19.1 $\pm$ 0.86 | 17.9 $\pm$ 4.37  | 20.3 $\pm$ 6.65     | 15.3 $\pm$ 2.57  |
| IN859                    | 3.83 $\pm$ 0.22 | 7.155 $\pm$ 0.05 | 2.59 $\pm$ 0.43     | 6.15 $\pm$ 3.1   |
| CNS-1                    | 4.79 $\pm$ 1.13 | 2.84 $\pm$ 0.21  | 2.8 $\pm$ 0.11      | 3.9 $\pm$ 0.21   |
| GL26                     | 0.88 $\pm$ 0.35 | 0.89 $\pm$ 0.13  | 0.68 $\pm$ 0.21     | 1.52 $\pm$ 0.18  |

Established human glioma cell lines (U251, U87), cultures from human glioma biopsies (IN859, IN 2045), rat (CNS-1), and mouse (GL26) glioma cells were mock infected or incubated with 1 blue forming unit/cell of a HC-Ad vector encoding  $\beta$ -Gal under the control of the murine CMV promoter (HC-Ad- $\beta$ -Gal) for 48 h. Cells were then incubated in the presence or absence of the prodrug ganciclovir (GCV, 10  $\mu$ M) and, after 48 h, cell death was determined by flow cytometric analysis of cell cycle. Mean $\pm$ SEM of the percentage of hypodiploid cells in control (mock) and HC-Ad- $\beta$ -Gal infected groups are depicted in the table.
